# Supplementary material for: Human antibody–Fc receptor interactions illuminated by crystal structures
Source: Springer Nature journal article supplement (doi:10.1038/nri1266), 2004-01-20
Supplement: 41577_2004_BFnri1266_MOESM2_ESM.pdf [file 41577_2004_BFnri1266_MOESM2_ESM.pdf]

Table S1 | **Key human antibody Fc region X-ray crystal structures**

| Antibody Fc region | Domains crystallized                                                        | Fragment details                                                                           | Complex status                                  | References |
|--------------------|-----------------------------------------------------------------------------|--------------------------------------------------------------------------------------------|-------------------------------------------------|------------|
| IgG1 Fc            | C $\gamma$ 2 and C $\gamma$ 3                                               | Thr223–Lys447                                                                              | Uncomplexed                                     | 1          |
|                    |                                                                             |                                                                                            | Complexed with fragment B of protein A          | 2          |
|                    |                                                                             |                                                                                            | Uncomplexed and complexed with Fc $\gamma$ R1II | 38         |
|                    | C $\gamma$ 2 and C $\gamma$ 3                                               | Cys226–Lys447                                                                              | Complexed with Fc $\gamma$ R1II                 | 40         |
|                    | Entire antibody (Dob)                                                       | Intact antibody lacking hinge region                                                       | Uncomplexed                                     | 96         |
| IgE Fc             | C $\epsilon$ 3 and C $\epsilon$ 4 with C $\epsilon$ 2–C $\epsilon$ 3 linker | Asp330–Lys547 with preceding Cys residue                                                   | Uncomplexed                                     | 4          |
|                    | C $\epsilon$ 2, C $\epsilon$ 3 and C $\epsilon$ 4                           | Lys234–Lys547 with point mutations (Asn265Gln and Asn371Gln) to facilitate crystallization | Complexed with Fc $\epsilon$ RI                 | 3          |
|                    |                                                                             |                                                                                            | Uncomplexed                                     | 5          |
| IgA Fc             | C $\alpha$ 2 and C $\alpha$ 3 lacking tailpiece                             | Cys242–Lys454                                                                              | Complexed with Fc $\alpha$ RI                   | 6          |

Table S2 | **Contributions to Fc stability**

| Antibody | Surface area buried in protein–protein domain interactions ( $\text{\AA}^2$ ) per Fc |                                       |                                            | Inter-heavy-chain disulphide bonds |                                                               | Fc carbohydrate attachment sites analysed     | Domain surface area buried by interaction with carbohydrate ( $\text{\AA}^2$ ) per Fc |                              |
|----------|--------------------------------------------------------------------------------------|---------------------------------------|--------------------------------------------|------------------------------------|---------------------------------------------------------------|-----------------------------------------------|---------------------------------------------------------------------------------------|------------------------------|
|          | C $\gamma$ 2–C $\gamma$ 2                                                            | C $\gamma$ 2–C $\gamma$ 3             | C $\gamma$ 3–C $\gamma$ 3                  | Hinge                              | Fc                                                            |                                               | Penultimate domain                                                                    | C-terminal domain            |
| IgG      | None                                                                                 | 1556                                  | 2180                                       | 2 or more (varies with subclass)   | None                                                          | Asn297* in C $\gamma$ 2                       | C $\gamma$ 2: 1044                                                                    | C $\gamma$ 3: None           |
| IgA      | C $\alpha$ 2–C $\alpha$ 2<br>275                                                     | C $\alpha$ 2–C $\alpha$ 3<br>1662     | C $\alpha$ 3–C $\alpha$ 3<br>2061          | None                               | Three in C $\alpha$ 2:<br>Cys241–Cys241<br>Cys242–Cys299* x 2 | Asn263 in C $\alpha$ 2<br>Asn459 in tailpiece | C $\alpha$ 2: 930<br>Unknown                                                          | C $\alpha$ 3: 914<br>Unknown |
| IgE      | C $\epsilon$ 3–C $\epsilon$ 3<br>None                                                | C $\epsilon$ 3–C $\epsilon$ 4<br>1744 | C $\epsilon$ 4–C $\epsilon$ 4<br>1860–2326 | No hinge present                   | Two in C $\epsilon$ 2:<br>Cys241–Cys328 x 2                   | Asn394* in C $\epsilon$ 3                     | C $\epsilon$ 3: 900                                                                   | C $\epsilon$ 4: None         |

\*Homologous residues.
